# Supplementary material for: Synthesis, Cytotoxicity Assessment and Optical Properties Characterization of Colloidal GdPO4:Mn2+, Eu3+ for High Sensitivity Luminescent Nanothermometers Operating in the Physiological Temperature Range
Source: MDPI journal article supplement (doi:10.3390/nano10030421), 2020-02-28
Supplement: s1 [file s1]

## Supplementary Information

# Synthesis, Cytotoxicity Assessment and Optical Properties Characterization of Colloidal GdPO<sub>4</sub>:Mn<sup>2+</sup>, Eu<sup>3+</sup> for High Sensitivity Luminescent Nanothermometers Operating in the Physiological Temperature Range

K. Maciejewska<sup>1\*</sup>, B. Poźniak<sup>2</sup>, M. Tikhomirov<sup>2</sup>, A. Kobylińska<sup>1</sup> and L. Marciniak<sup>1\*</sup>

<sup>1</sup> Institute of Low Temperature and Structure Research, Polish Academy of Sciences, Okólna 2, 50-422 Wrocław, Poland

<sup>2</sup> Wrocław University of Environmental and Life Sciences, ul. C.K. Norwida 31, 50-366 Wrocław

\* Correspondence: k.maciejewska@intibs.pl; l.marciniak@intibs.pl

**Table S1.** The results of ICP measurements for selected nanocrystals.

| Sample          | % Mn        | % Eu     | % Gd     |
|-----------------|-------------|----------|----------|
| 15% Mn          | 18.42113361 | 0        | 81.57887 |
| 1% Eu           | 0           | 1.312104 | 98.6879  |
| 1% Mn, 1% Eu    | 1.625904839 | 1.278901 | 97.09519 |
| 5% Mn, 1% Eu    | 6.324815405 | 1.20382  | 92.47136 |
| 10% Mn, 1% Eu   | 11.32800033 | 1.305311 | 87.36669 |
| 15% Mn, 1% Eu   | 17.80329943 | 1.313448 | 80.88325 |
| 15% Mn, 0.1%Eu  | 18.74500723 | 0.109384 | 81.14561 |
| 15% Mn, 0.2% Eu | 17.76267241 | 0.219622 | 82.01771 |
| 15% Mn, 0.5% Eu | 16.81513671 | 0.712126 | 82.47274 |

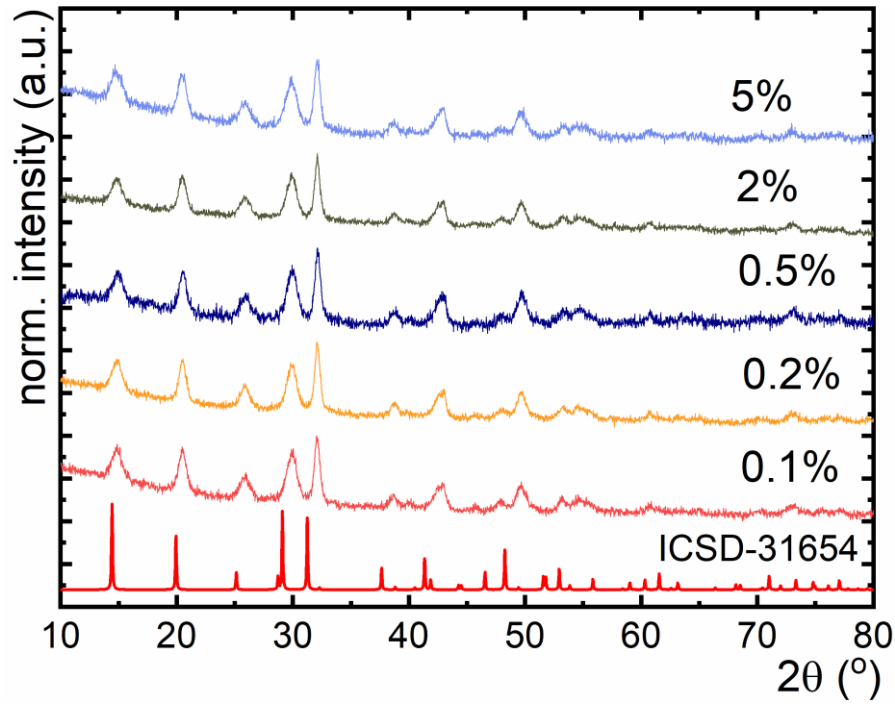

**Figure S1.** The comparison of X-ray diffractograms of  $\text{GdPO}_4:10\text{Mn}^{2+}$ ,  $x\%\text{Eu}^{3+}$  with different concentration of  $\text{Eu}^{3+}$  ions.

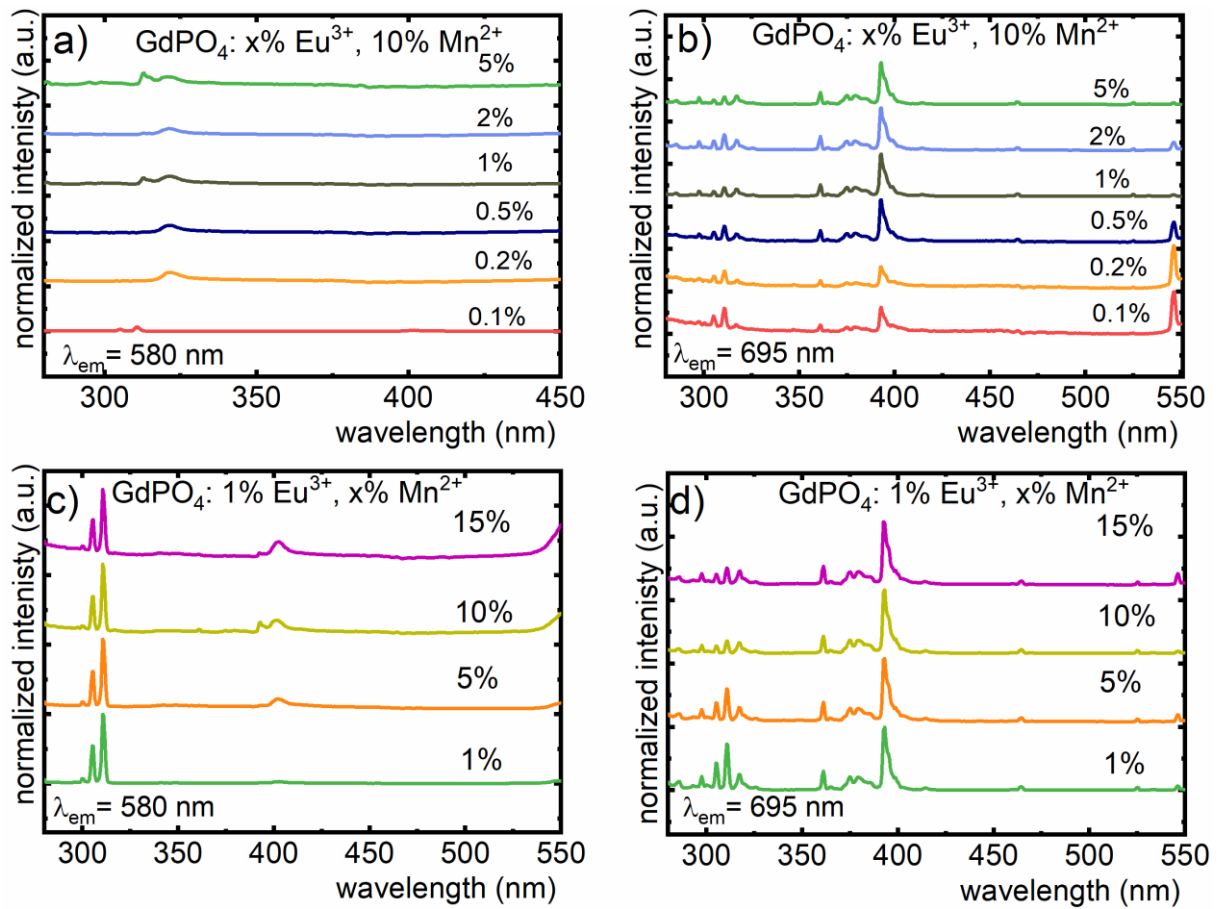

**Figure S2.** Excitation spectra of  $\text{GdPO}_4$  doped with different concentration of  $\text{Mn}^{2+}$  (a, c) and  $\text{Eu}^{3+}$  (b, d) ions with emission monitored at 695 nm ( ${}^5\text{D}_0 \rightarrow {}^7\text{F}_j$  electronic transition of  $\text{Eu}^{3+}$ ) - (c, d) and at emission 580 nm ( ${}^4\text{T}_1 \rightarrow {}^6\text{A}_1$  electronic transition of  $\text{Mn}^{2+}$ ) (a, b).

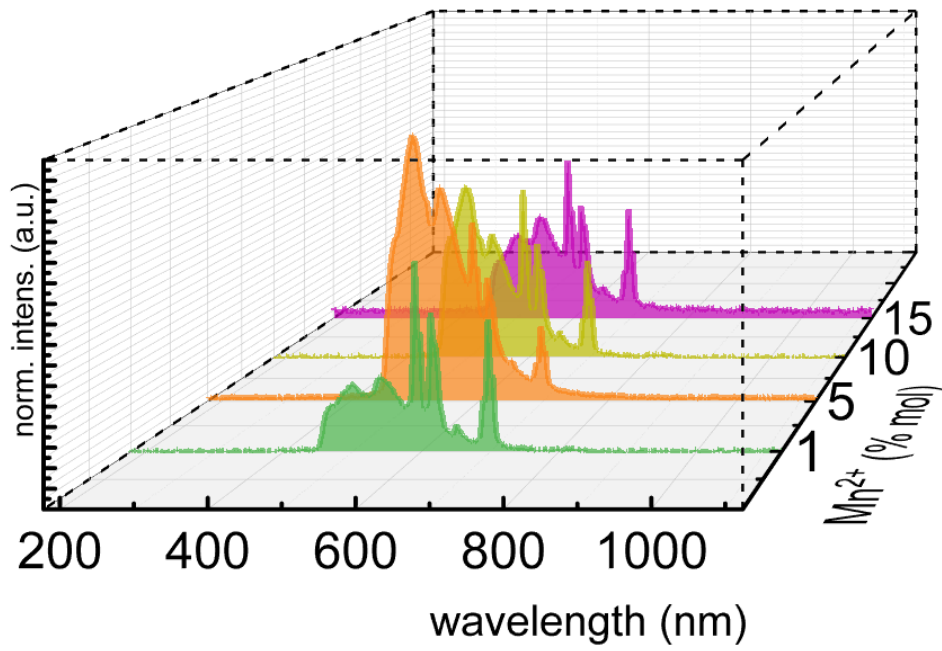

**Figure S3.** The comparison of room temperature emission spectra of  $\text{GdPO}_4:1\%\text{Eu}^{3+}, x\%\text{Mn}^{2+}$  with different concentration of  $\text{Mn}^{2+}$  ions.

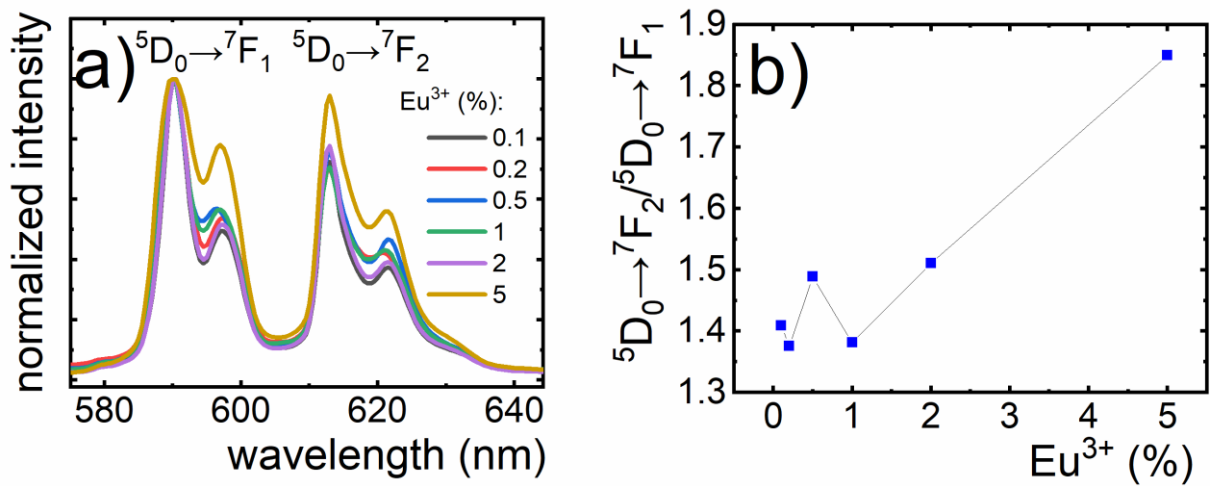

**Figure S4.** The comparison of normalized (to the intensity of  ${}^5\text{D}_0 \rightarrow {}^7\text{F}_1$  emission band) room temperature emission spectra of  $\text{GdPO}_4:\text{Eu}^{3+}$  nanocrystals with different concentration of  $\text{Eu}^{3+}$  ions – (a) and the disorder parameter (emission intensity ratio of  ${}^5\text{D}_0 \rightarrow {}^7\text{F}_2$  band to the  ${}^5\text{D}_0 \rightarrow {}^7\text{F}_1$  band)-(b).

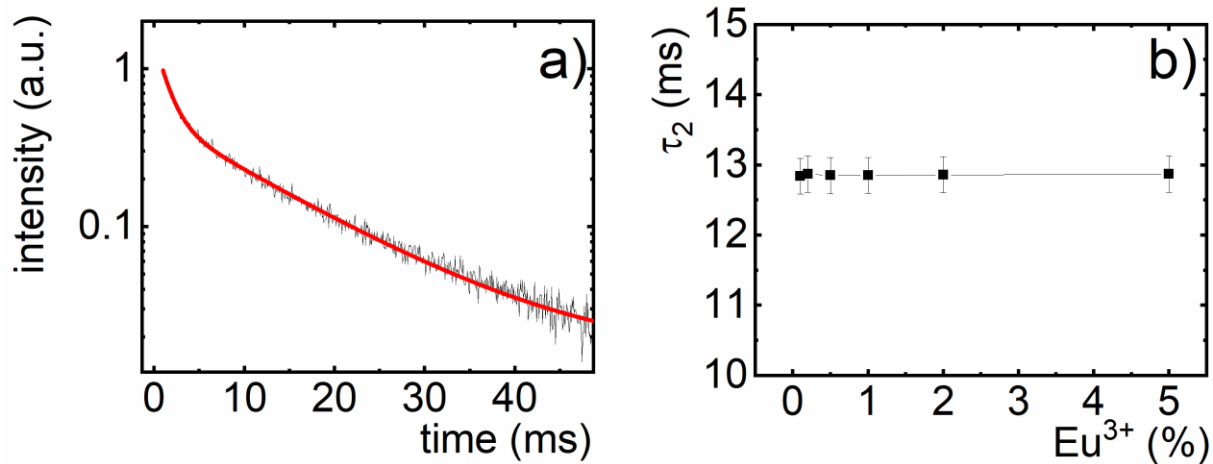

**Figure S5.** Luminescence decay profile of Mn<sup>2+</sup> luminescence (λ<sub>em</sub> = 550 nm) for GdPO<sub>4</sub>:10%Mn<sup>2+</sup>, 5%Eu<sup>3+</sup> nanocrystals with double exponential fit-a) and lifetime τ<sub>2</sub> calculated from double exponential fitting as a function of Eu<sup>3+</sup> concentration-b).

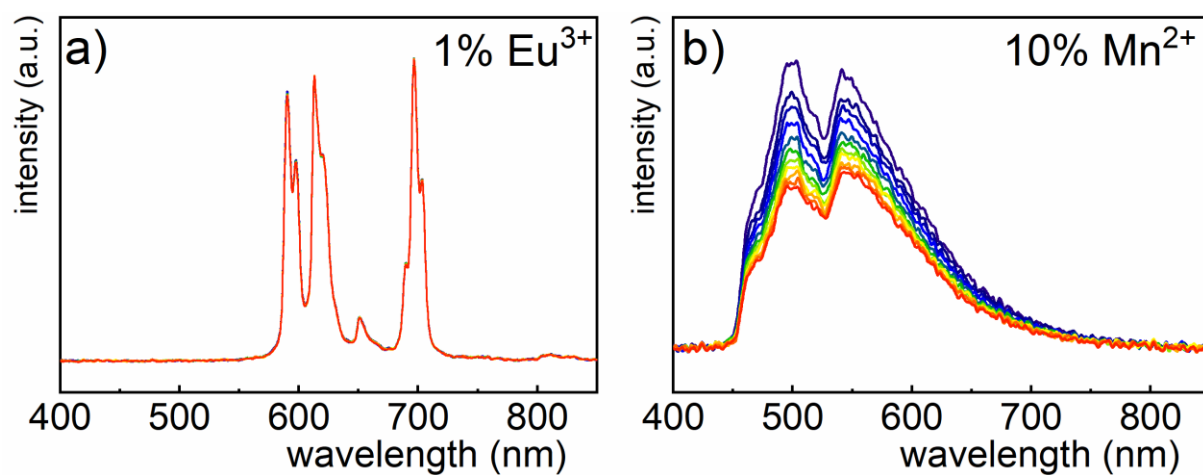

**Figure 6.** Thermal evolution spectra of GdPO<sub>4</sub> nanocrystals doped with: 1%Eu<sup>3+</sup> (a) and 10%Mn<sup>2+</sup> (b).

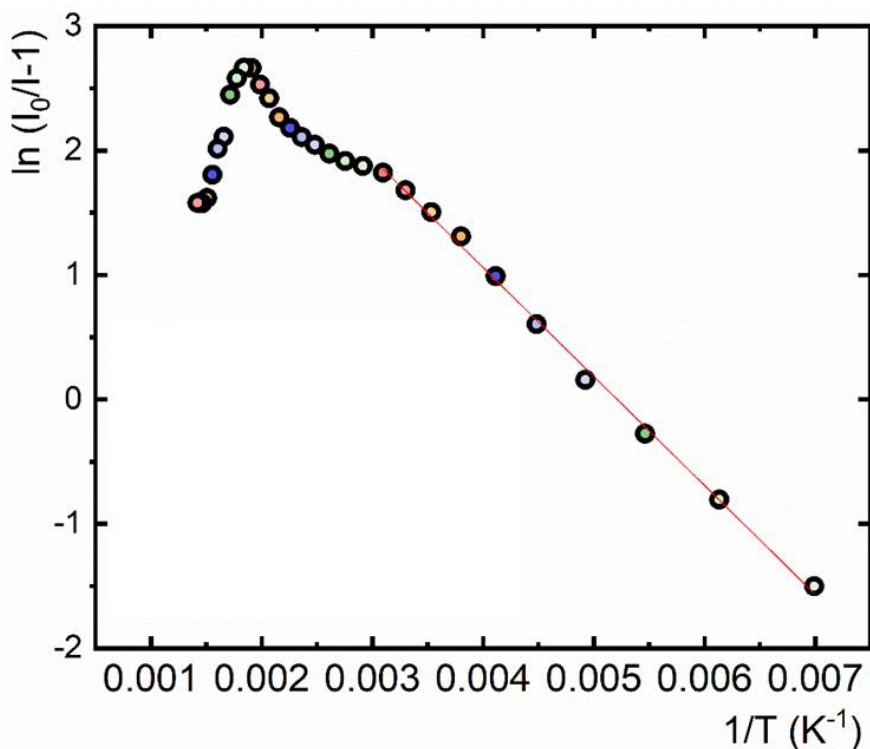

Figure S7. The  $\ln(I_0/I-1)$  vs  $1/T$  plot for  $\text{GdPO}_4: 10\% \text{Mn}^{2+}$  nanocrystals.

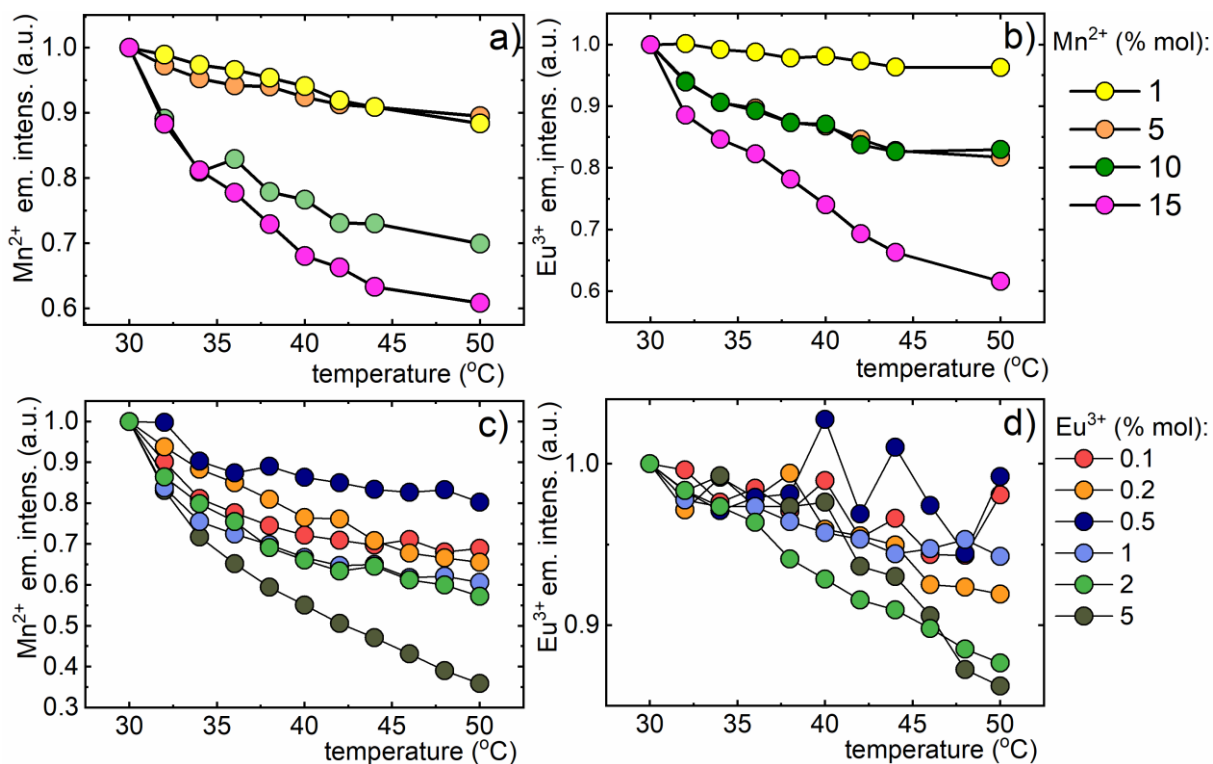

Figure S8. Thermal evolution of integrated  $\text{Eu}^{3+}$  (a, c) and  $\text{Mn}^{2+}$  (b, d) emission intensities for  $\text{GdPO}_4$  doped with different concentration of  $\text{Mn}^{2+}$  (1, 5, 10, 15%) with 1%  $\text{Eu}^{3+}$  and  $\text{Eu}^{3+}$  (0.1, 0.2, 0.5, 1, 2, 5%) with 10%  $\text{Mn}^{2+}$ .

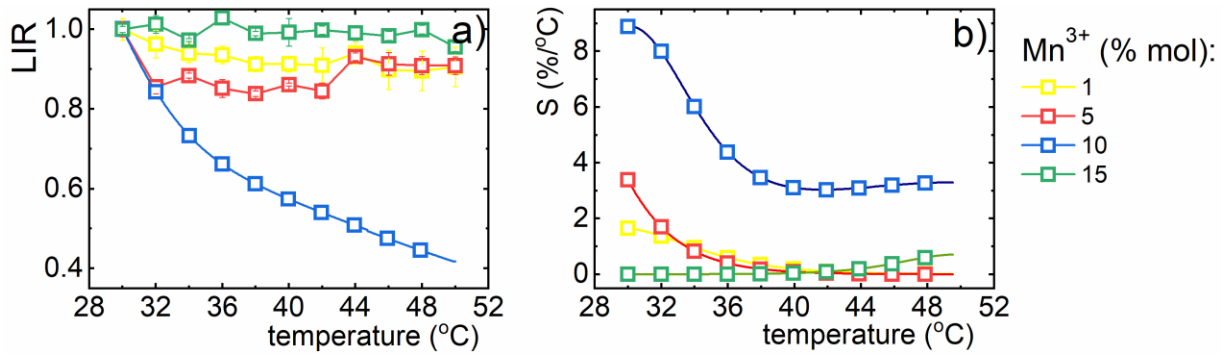

**Figure S9.** Thermal evolution of luminescence intensity ratio (LIR) (a) their relative sensitivities (b) for GdPO<sub>4</sub> doped with 1% Eu<sup>3+</sup> and 1, 5, 10, 15 % Mn<sup>2+</sup> nanoparticles.

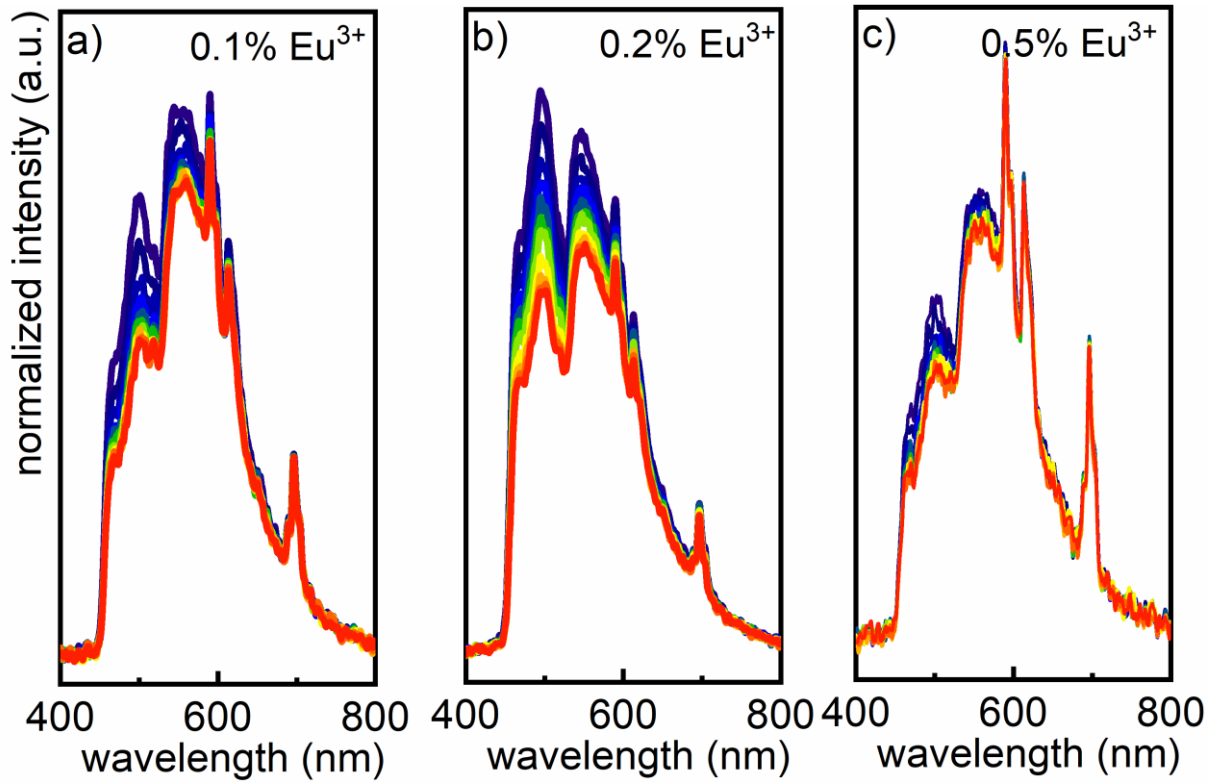

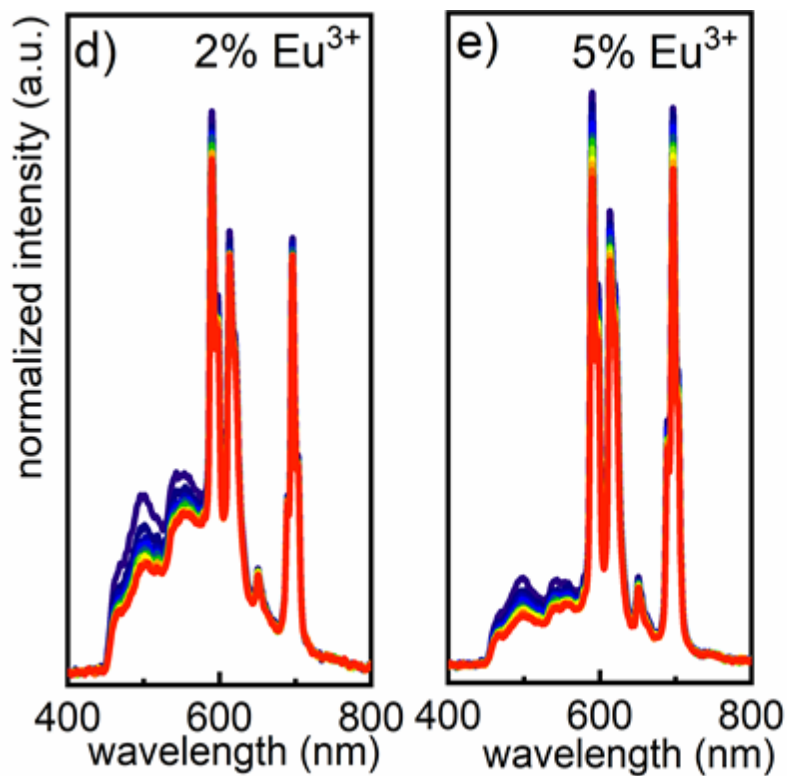

**Figure S10.** Thermal evolution spectra of GdPO<sub>4</sub> nanocrystals doped with: 0.1%Eu<sup>3+</sup>, 10%Mn<sup>2+</sup>-(a); 0.2%Eu<sup>3+</sup>, 10%Mn<sup>2+</sup>-(b); 0.5%Eu<sup>3+</sup>, 10%Mn<sup>2+</sup>-(c); 2%Eu<sup>3+</sup>, 10%Mn<sup>2+</sup>-(d); 5%Eu<sup>3+</sup>, 10%Mn<sup>2+</sup>-(e) monitored at 30-50 °C.

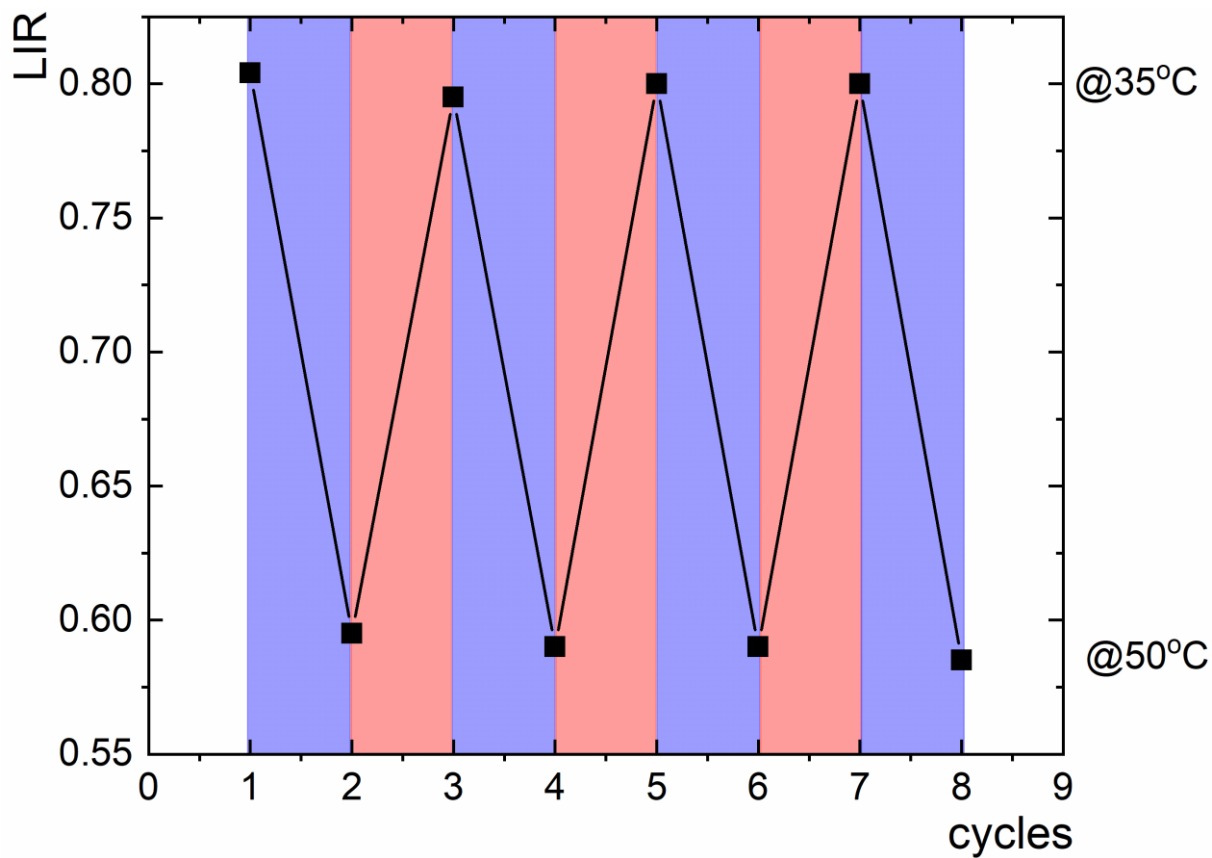

**Figure S11.** Thermal dependence of LIR for the GdPO<sub>4</sub> 10% Mn<sup>2+</sup>, 1%Eu<sup>3+</sup> nanocrystals during heating-cooling cycles.
